# Supplementary material for: ATBS1-INTERACTING FACTOR 2 Negatively Modulates Pollen Production and Seed Formation in Arabidopsis
Source: PubMed Central journal article supplement (PMC8353282; doi:10.3389/fpls.2021.704958), 2021-07-27
Supplement: Data_Sheet_1.pdf [file Data_Sheet_1.pdf]

**Article title:** ATBS1-INTERACTING FACTOR 2 negatively modulates pollen production and seed formation in *Arabidopsis*

**Authors:** Yoon Kim, Sun-Ho Kim, Dong-Min Shin, Soo-Hwan Kim

**The following Supporting Information is available for this article:**

**Figure S1.** Expression level-dependent aerial and silique phenotypes of AIF2-overexpressing independent transgenic lines (*p35S::AIF2-EGFP/Col-0*, AIF2ox).

**Figure S2.** Expression of the native promoter-driven and CaMV35S promoter-driven AIF2 protein in floral organs.

**Figure S3.** Reduced pollen production in AIF2ox plants.

**Figure S4.** Efficacy of *in vitro*-germinated pollen tube growth.

**Figure S5.** Relative expression of *AIF2* (At3g06590) in developing seeds.

**Figure S6.** Morphology of seeds stained with mPS-PI, followed by confocal microscope observation.

**Table S1.** Primers used in cDNA amplification of *AIF2*

**Table S2.** Primers used in quantitative real time RT-PCR analysis

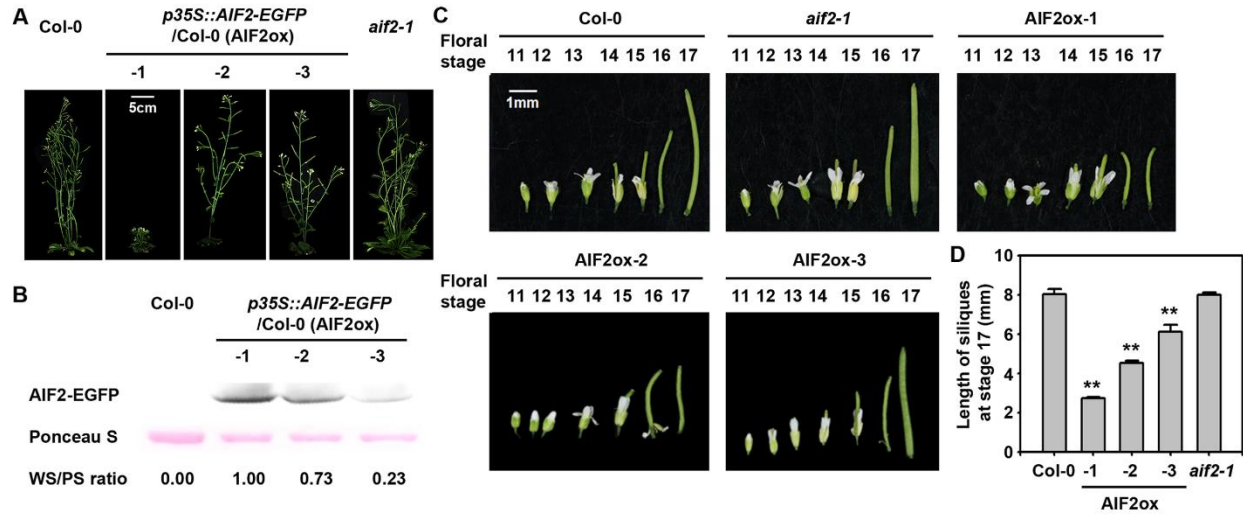

**Supplementary Figure S1.** Expression level-dependent aerial and silique phenotypes of AIF2-overexpressing independent transgenic lines (*p35S::AIF2-EGFP/Col-0*, AIF2ox). **(A)** Aerial phenotypes of 8-week-old plants. **(B)** Western blot analysis showing ectopic expression of AIF2-EGFP, ranging from high to low levels compared with the Columbia wild-type (Col-0) control. Total protein extracts were isolated from leaves of plants described in (A), size-fractionated by SDS-PAGE, and probed against anti-GFP antibodies. Ponceau S staining was used to normalize AIF2 expression level (WS/PS ratio). **(C, D)** Pictures showing floral stage-dependent growth of siliques (C) and measurement of silique length at stage 17 (D). Number of siliques examined > 50.

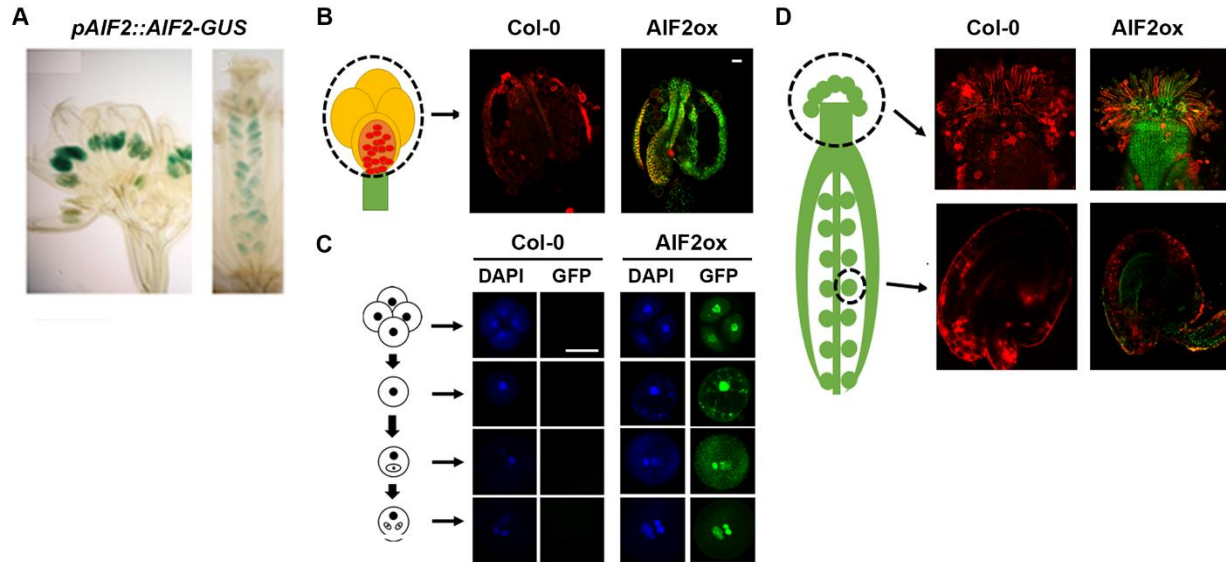

**Supplementary Figure S2.** Expression of the native promoter-driven and CaMV35S promoter-driven AIF2 protein in floral organs. **(A)** accumulation of the native promoter-driven AIF2-GUS protein in pollen grains and ovules **(B-D)** accumulation of ectopically-expressed AIF2-EGFP protein in anthers **(B)**, developing pollens **(C)**, and stigma/style and ovules **(D)**. Bar represents 10 $\mu$ m in length. Red: PI-stained fluorescence, Blue: DAPI-stained fluorescence, Green: GFP fluorescence.

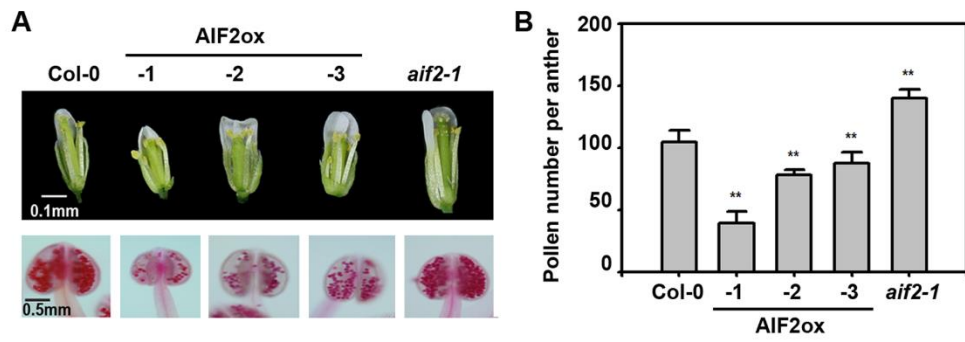

**Supplementary Figure S3.** Reduced pollen production in AIF2ox plants. **(A)** Anthers of different transgenic lines were stained with Alexander's solution and **(B)** the resulting dye-stained pollens were counted. Number of anthers examined > 50.

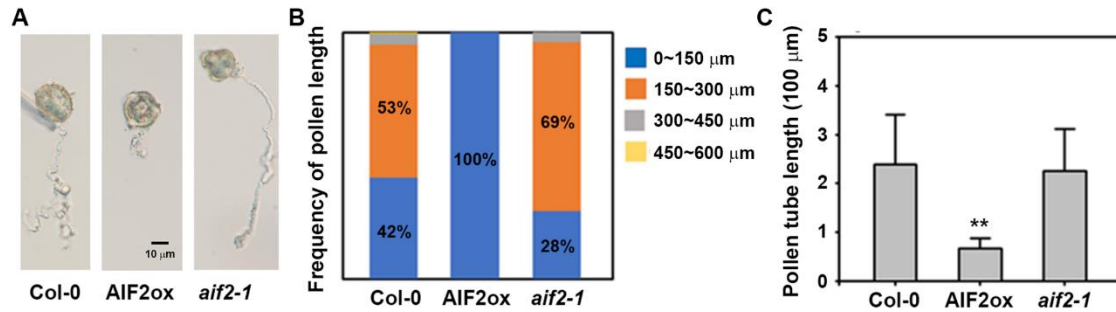

**Supplementary Figure S4.** Efficacy of *in vitro*-germinated pollen tube growth. Pollen grains of Col-0, AIF2ox, *aif2-1* plants were grown on a solid germination medium for 6 hrs in dark at room temperature. Data show (A) pictures of germinated pollen grains, (B) frequency of pollens that show tube growth in a range of the indicated length, and (C) the average tube length of all germinated pollens. Number of pollens examined > 3,000 taken from 20-25 open flowers.

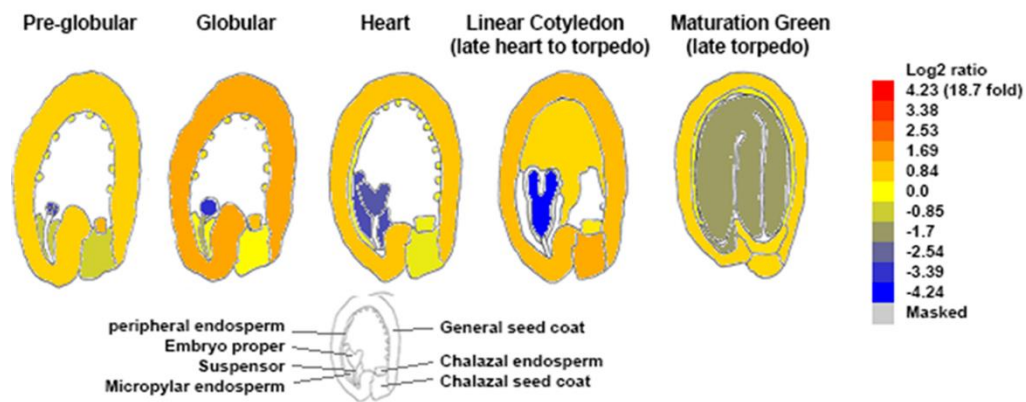

**Supplementary Figure S5.** Relative expression of *AIF2* (At3g06590) in developing seeds. Tissue-specific expression was analyzed using a plant eFP viewer tool provided by ePlant web site (<http://bar.utoronto.ca/eplant/>, University of Toronto).

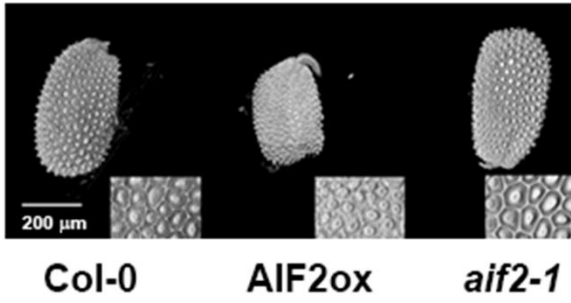

**Supplementary Figure S6.** Morphology of seeds stained with mPS-PI, followed by confocal microscope observation. The insert in picture is the magnified image of seed surface.

| <b>Supplementary Table S1.</b> Primers used in cDNA amplification of <i>AIF2</i> |                                                         |                             |
|----------------------------------------------------------------------------------|---------------------------------------------------------|-----------------------------|
| Amplification                                                                    | Gene fragment cloned                                    | Primer sets (5' to 3')      |
| AIF2FL                                                                           | Full-length cDNA of <i>AIF2</i> coding region           | CACCATGGCGTCTCTGATCTCAGATAT |
|                                                                                  |                                                         | AATCGGTGGAGGAGCTGAGCCG      |
| AIF2dC                                                                           | cDNA encoding N-terminus and bHLH domain of <i>AIF2</i> | CACCATGGCGTCTCTGATCTCAGATAT |
|                                                                                  |                                                         | CTCCAGAGCCTGAATATAATCAGTTGC |



| <b>Supplementary Table S2. Primers used in quantitative real time RT-PCR analysis</b> |           |                           |
|---------------------------------------------------------------------------------------|-----------|---------------------------|
| Gene                                                                                  | Locus     | Primer set (5' to 3')     |
| <i>IND</i>                                                                            | At4g00120 | CAGCCCCAAAAGAAGCATGATGG   |
|                                                                                       |           | TTAGGGTTTCGGGAGGTGGATCTAA |
| <i>ALC</i>                                                                            | At5g67110 | CTCTCGAGCTTTCTCCGAACGATTC |
|                                                                                       |           | TGTCTTGGCCAGTTTCAGAGACTCC |
| <i>MSI</i>                                                                            | At5g22260 | TGGTGGGTGGTCAAATAGAG      |
|                                                                                       |           | TCATCATTCCTACGTTCCCT      |
| <i>SPL</i>                                                                            | At4g27330 | TCGCTAGAGCAGCTTCAGTT      |
|                                                                                       |           | CCTCCATTGGTCCCGTAT        |
| <i>TDF1</i>                                                                           | At3g28470 | CGGTCCTCAAGTAGTGGG        |
|                                                                                       |           | ATGTATTCGGCTTCGATGTT      |
| <i>TCPI</i>                                                                           | At1G67260 | GGTACGGTGAAGAAGAAGTGG     |
|                                                                                       |           | TCCTCTAGCTTTGGCTCCTAG     |
| <i>TCP4</i>                                                                           | At3G15030 | AGGAGCAGAGCATCCGAGTA      |
|                                                                                       |           | ATTGACGGCGGGAGAAAAC       |
| <i>YUCCA1</i>                                                                         | At4g32540 | CTCGTCCGACATAACGCATCTCCT  |
|                                                                                       |           | CCCAACCGGTGTATTTCCAAAC    |
| <i>YUCCA2</i>                                                                         | At4g13260 | TCCCTAAAGATTTCTGTGAG      |
|                                                                                       |           | CCACCGTGATACATACTCC       |
| <i>YUCCA6</i>                                                                         | At5g25620 | GGGAGAAGAAGGCACGAC        |
|                                                                                       |           | GAAGGCTGAGCACCGAAG        |
| <i>ARF6</i>                                                                           | At1g30330 | GCATGCTGATGTGGAGACTGATGAA |
|                                                                                       |           | GGCTGCTGCGAGTAATCCAAGG    |
| <i>ARF8</i>                                                                           | At5g37020 | TGGGTCAACAGGGTCATGAAGGAGA |
|                                                                                       |           | TGTGGTGGTAGGCTTGGGTAATTGG |
| <i>DWF4</i>                                                                           | At1g78540 | ACAGCAAACAACGGAGCG        |
|                                                                                       |           | TCTGAACCAGCACATAGCCT      |
| <i>SHB1</i>                                                                           | At1g78540 | CAGGTTCAAGCACTGAGGAGT     |
|                                                                                       |           | TGCTTCCTCGGTTTAGAGTA      |
| <i>IKU1</i>                                                                           | At2g35230 | TTTGGGTGTGAATAGGATTGG     |
|                                                                                       |           | CGCTGCAACCGTGTATTCT       |
| <i>MINI3</i>                                                                          | At1g55600 | TTTGATGATATTGCAACGGAA     |
|                                                                                       |           | GATCCTTTGTGTCTTGCTTGT     |
| <i>AP2</i>                                                                            | At4g36920 | ATTCGGCTAATTCGAAGCATAA    |
|                                                                                       |           | AGAGGAGGTTGGAAGCCATT      |

| <b>Supplementary Table S2. Primers used in quantitative real time RT-PCR analysis</b> |           |                            |
|---------------------------------------------------------------------------------------|-----------|----------------------------|
| Gene                                                                                  | Locus     | Primer set (5' to 3')      |
| <i>ARF2</i>                                                                           | At5g62000 | TTTACCAGCAAGCGGACTTT       |
|                                                                                       |           | CTGGCTGAGGACATCCAGTT       |
| <i>SWEET11</i>                                                                        | At3g48740 | GGAGCCACACGTGCTAAGATTATCG  |
|                                                                                       |           | ACCAAGCACATTCGGGAAAGCAA    |
| <i>SWEET12</i>                                                                        | At5g23660 | GCGCCGCTTAGCATTATCAGAAC    |
|                                                                                       |           | TGCACCTAGAACAAACCCAATCACG  |
| <i>SWEET15</i>                                                                        | At5g50800 | CGTGGCTCGTGTGATAAAGACAAAG  |
|                                                                                       |           | CCACCACGTTTGGAATCGCTATG    |
| <i>FAD2</i>                                                                           | At3g12120 | TAACGTTATCGCCCCTACGTCAGC   |
|                                                                                       |           | AATTGGTGGCGACGTAGTAGAAGCA  |
| <i>FAD3</i>                                                                           | At2g29980 | CACTCGCGGTTCTTAAAGTCTACGG  |
|                                                                                       |           | TGGCGTCGACCAAGTGATAGTGA    |
| <i>LPCAT1</i>                                                                         | At1g12640 | GCAACAAGCGATCAGTCCGAAAATG  |
|                                                                                       |           | AAGCGCGGGAAACTTACTTACCG    |
| <i>LPCAT2</i>                                                                         | At1g63050 | TGCGGTTTCAGATTCCGCTTTTCT   |
|                                                                                       |           | TGTTGCCACCGGTAAATAGCTTTTCG |
| <i>PDAT1</i>                                                                          | At5g13640 | TGCGAGCTTCCCTCAGTATGTAACG  |
|                                                                                       |           | GCTGGATCCAACCCAGTTTCATTGT  |
| <i>UBC1</i>                                                                           | At1g14400 | TCATCGCACGGTGATATTGAGAATC  |
|                                                                                       |           | TCGACATCCTCCTTTCTTTCGTGGA  |
